# Supplementary material for: Unraveling the structural and bonding nature of antimony sesquichalcogenide glass for electronic and photonic applications
Source: Royal Society of Chemistry journal article supplement (doi:10.1039/d1tc01433a), 2021-01-01
Supplement: d1tc01433a1.pdf [file d1tc01433a1.pdf]

## Unraveling structural and bonding nature of Sb-based chalcogenide glass for electronic and photonic applications

Meng Xu,<sup>1</sup> Rongchuan Gu,<sup>1</sup> Chong Qiao,<sup>1,\*</sup> Hao Tong,<sup>1</sup> Xiaomin Cheng,<sup>1</sup> Cai-Zhuang Wang,<sup>2</sup> Kai-Ming Ho,<sup>2</sup> Songyou Wang,<sup>3</sup> Xiangshui Miao,<sup>1</sup> and Ming Xu<sup>1,\*</sup>

<sup>1</sup>Wuhan National Laboratory for Optoelectronics, School of Optical and Electronic Information, Huazhong University of Science and Technology, Wuhan 430074, China

<sup>2</sup>Ames Laboratory, U. S. Department of Energy and Department of Physics and Astronomy, Iowa State University, Ames, Iowa 50011, USA

<sup>3</sup>Shanghai Ultra-Precision Optical Manufacturing Engineering Center and Department of Optical Science and Engineering, Fudan University, Shanghai 200433, China

\*Email: [qiaochong@hust.edu.cn](mailto:qiaochong@hust.edu.cn) and [mxu@hust.edu.cn](mailto:mxu@hust.edu.cn)

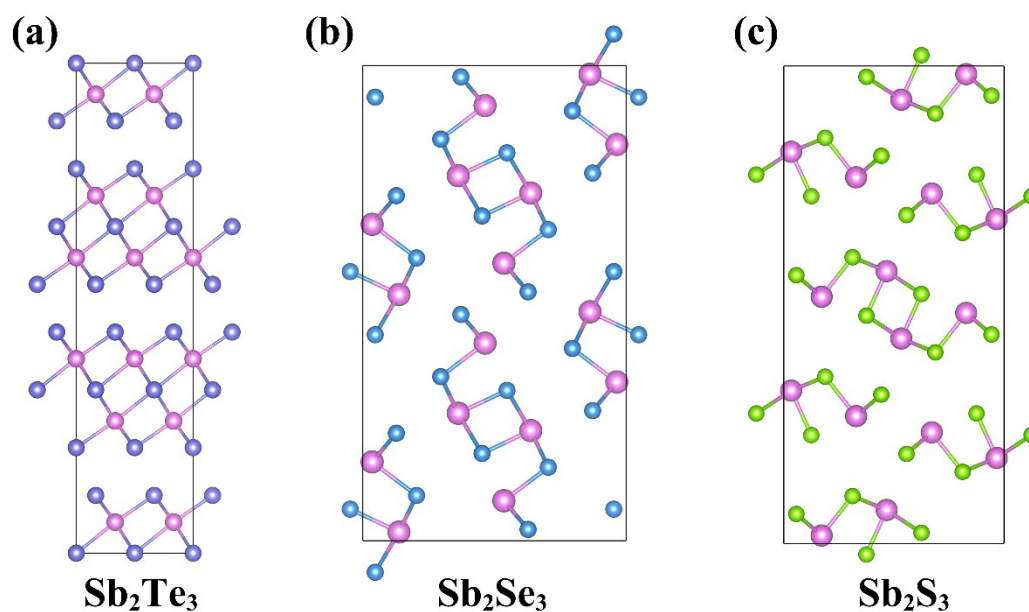

Figure S1. Crystal structures of  $\text{Sb}_2\text{Te}_3$ ,  $\text{Sb}_2\text{Se}_3$  and  $\text{Sb}_2\text{S}_3$ , in which  $\text{Sb}_2\text{Te}_3$  is a rhombohedral crystal structure with octahedral atomic cluster, while both  $\text{Sb}_2\text{Se}_3$  and

$\text{Sb}_2\text{S}_3$  are orthorhombic structures with chain-like atomic arrangement and strong anisotropy.

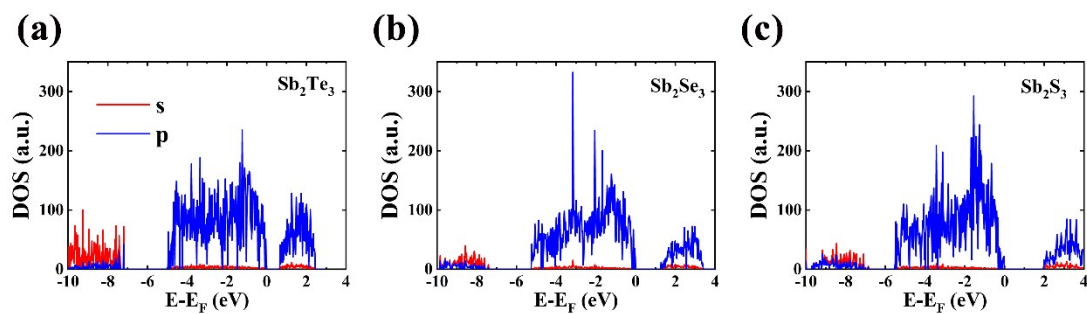

Figure S2. Partial density of states (PDOS) of amorphous  $\text{Sb}_2\text{Te}_3$ ,  $\text{Sb}_2\text{Se}_3$  and  $\text{Sb}_2\text{S}_3$ . All of them mainly show p orbital contribution, explaining their dominant  $90^\circ$  bonding angle.

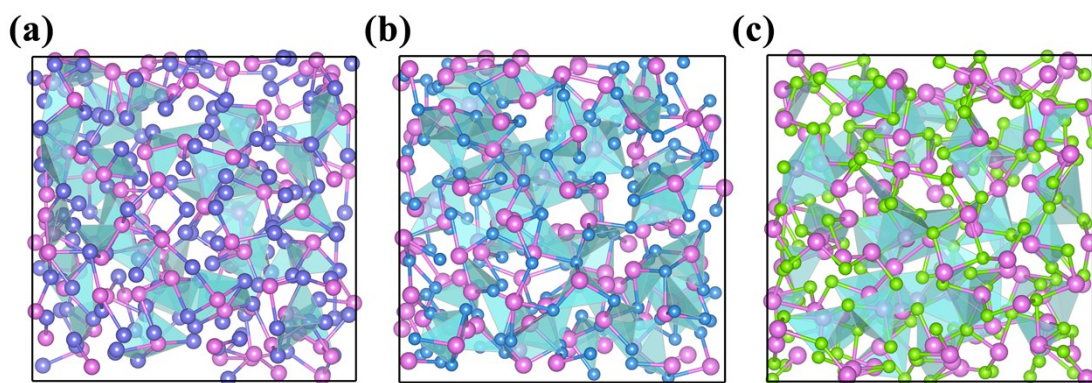

Figure S3. Amorphous models of  $\text{Sb}_2\text{Te}_3$ ,  $\text{Sb}_2\text{Se}_3$  and  $\text{Sb}_2\text{S}_3$ , and the Sb-center polyhedron is shown. All of them mainly form defective octahedral motifs, as most Sb atoms are 3-coordinated and form  $\sim 90^\circ$  bonding angle.

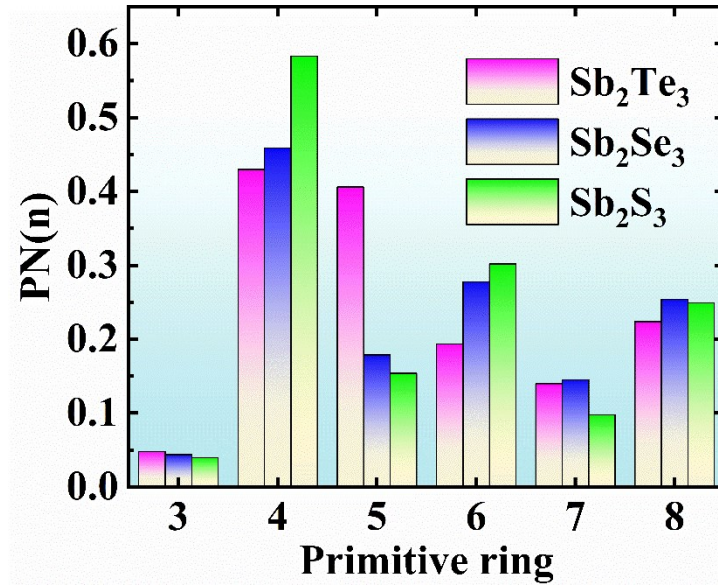

Figure S4. Primitive ring distribution is calculated through the RINGS-code. Here  $\text{PN}(n)$  shows the connectivity of various rings, i.e., shared atoms between rings.  $\text{Sb}_2\text{S}_3$  and  $\text{Sb}_2\text{Se}_3$  have more 4-fold rings than  $\text{Sb}_2\text{Te}_3$  (Figure 2a), meanwhile their 4-fold rings have more shared atoms.

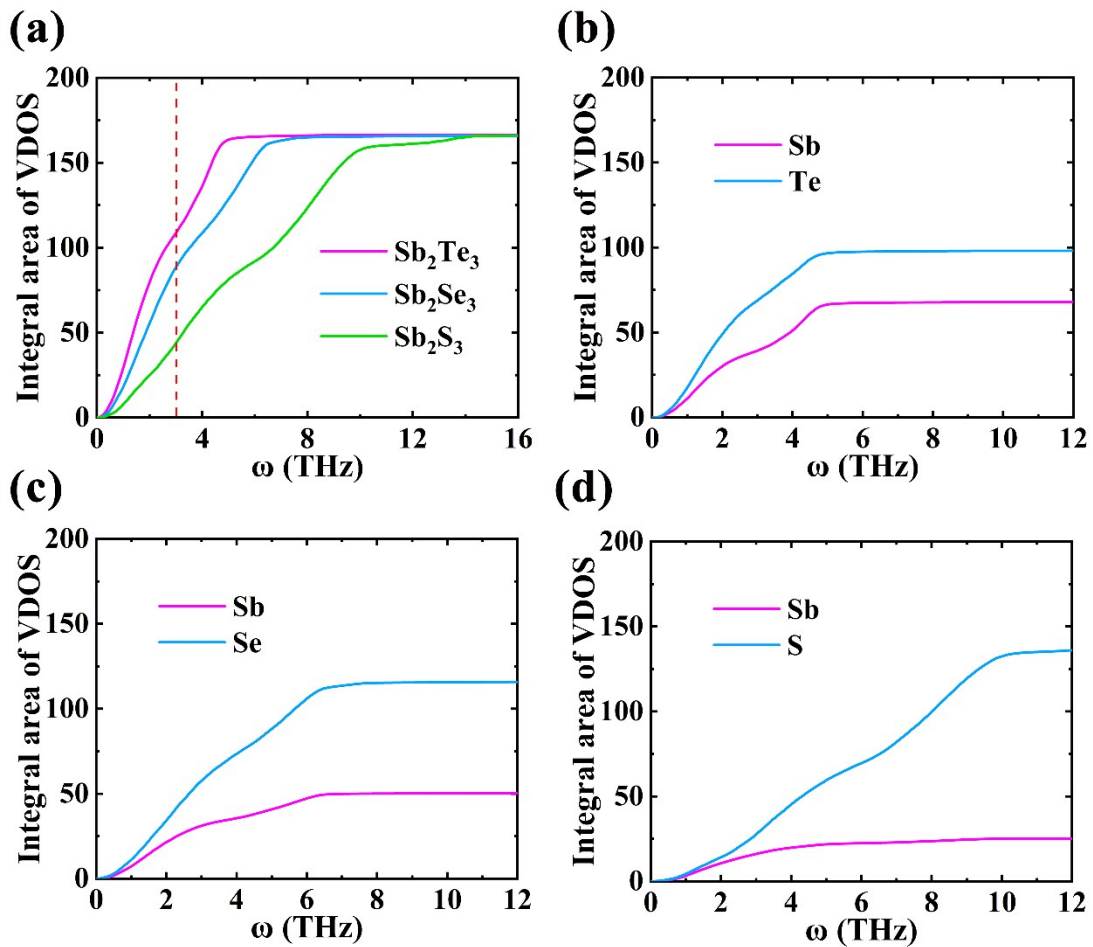

Figure S5 a) All of  $\text{Sb}_2\text{Te}_3$  and  $\text{Sb}_2\text{Se}_3$  and  $\text{Sb}_2\text{S}_3$  have the same integral areas of VDOS

(~166) at high enough frequency (~14THz), it confirms their total vibrational mode numbers keep the same. It also shows more low-frequency (below 3THz) modes and less high-frequency of  $\text{Sb}_2\text{Te}_3$ . b-d) Total integral areas are divided into two parts by elements. Their areas under the curves are ~67.9 of Sb and ~98.1 of Te, ~50.2 of Sb and ~115.8 of Se, ~25.3 of Sb and ~140.7 of S. Obviously the sums of two curves remain the same, equal to the total VDOS. Se and S have much more contribution to vibrational modes than Sb, meanwhile they have less low-frequency modes than Te, thus leads to less low-frequency modes of total VDOS.

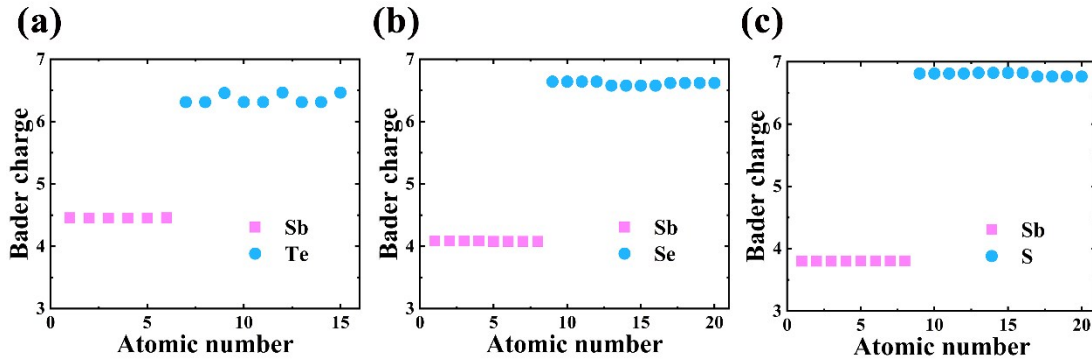

Figure S6. Bader charge distributions of  $\text{Sb}_2\text{Te}_3$ ,  $\text{Sb}_2\text{Se}_3$  and  $\text{Sb}_2\text{S}_3$  crystal. All of crystalline Te (6.36), Se (6.61) and S (6.80) get more electrons (~0.1) than in amorphous state. It shows an ionicity increase of three materials upon crystallization, which could be also responsible for property difference between amorphous and crystalline states. Meanwhile  $\text{Sb}_2\text{Se}_3$  and  $\text{Sb}_2\text{S}_3$  crystals still keep more ionic than  $\text{Sb}_2\text{Te}_3$ .

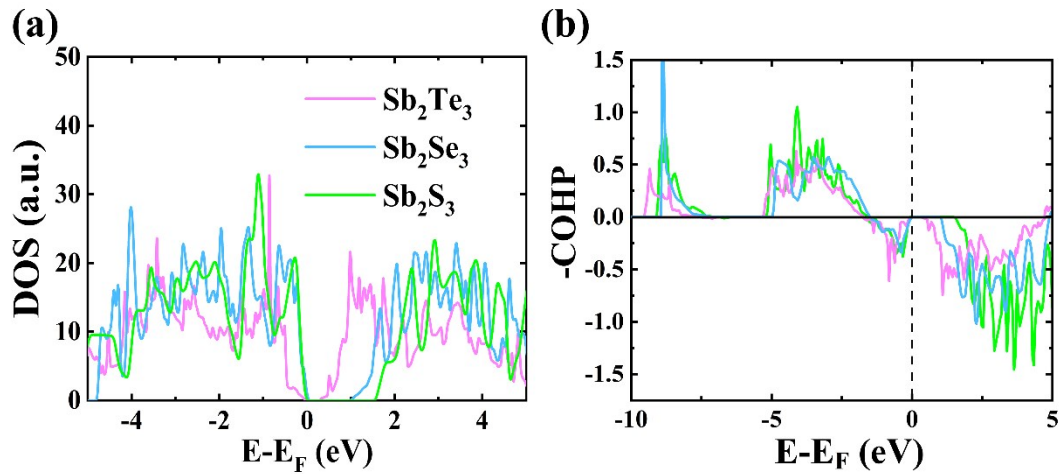

Figure S7. a) Total DOS of  $\text{Sb}_2\text{Te}_3$ ,  $\text{Sb}_2\text{Se}_3$  and  $\text{Sb}_2\text{S}_3$  crystals. b) Average -COHP of  $\text{Sb}_2\text{Te}_3$ ,  $\text{Sb}_2\text{Se}_3$  and  $\text{Sb}_2\text{S}_3$  crystals. All of them show antibonding state below fermi energy.  $\text{Sb}_2\text{Te}_3$  has slightly more antibonding state thus Sb-Te bonding is weaker.

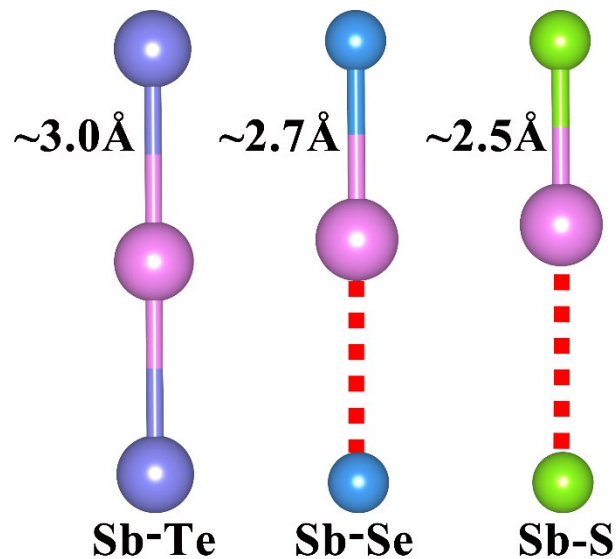

Figure S8. All amorphous  $\text{Sb}_2\text{Te}_3$ ,  $\text{Sb}_2\text{Se}_3$  and  $\text{Sb}_2\text{S}_3$  form a large number of bonding angles close to  $180^\circ$ . Sb would like to form similar bond lengths with two Te atoms. Once Se and S take place of Te, Sb atoms would move towards one side, leading to Peierls-like distortions.

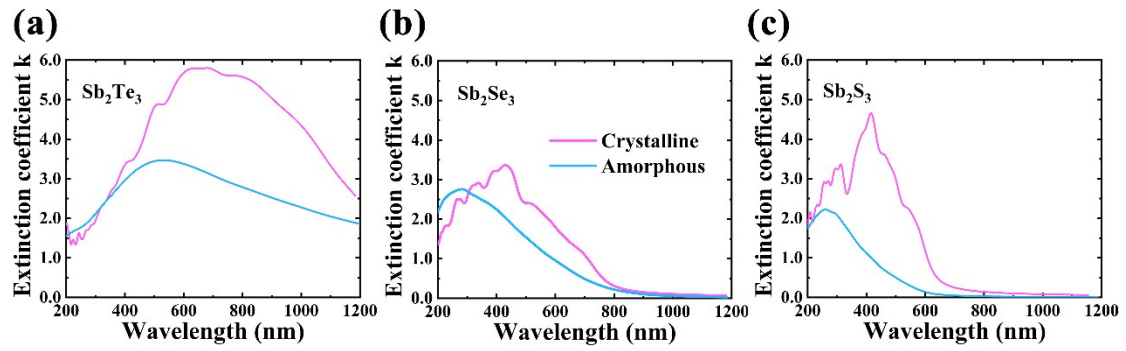

Figure S9. Calculated extinction coefficient  $k$  of both crystalline and amorphous states of three Sb-based materials.  $\text{Sb}_2\text{Te}_3$  has great extinction coefficient i.e. high optical loss of both amorphous and crystalline states until 1200 nm, thus not suitable for visible tuning photonics. Then  $\text{Sb}_2\text{Se}_3$  and  $\text{Sb}_2\text{S}_3$  show really low extinction coefficient at 800 nm in both amorphous and crystalline states, thus more popular in visible photonic device.
